# Supplementary material
Source: MDPI journal article supplement (https://www.mdpi.com/2071-1050/15/4/3743)
Supplement: s1 [file s1]

## Supplementary File

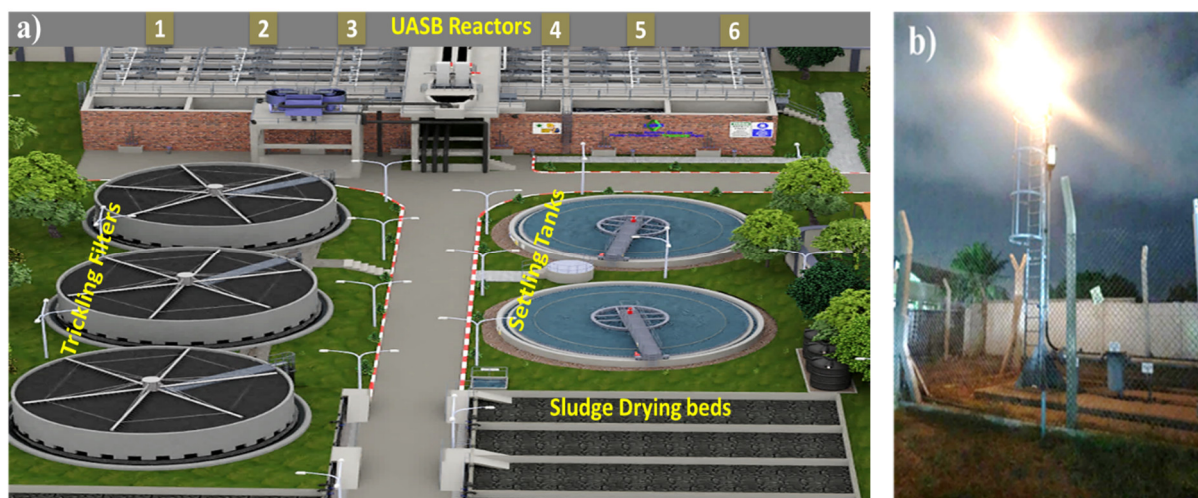

**Figure S1:** (a) General view of the Mudor wastewater treatment plant (WWTP); (b) Biogas flaring unit.

**Table S1:** Characteristics of pumping stations operating at the Mudor WWTP.

| Characteristics              | PS-1        | PS-2        | PS-3         | PS-4         |
|------------------------------|-------------|-------------|--------------|--------------|
| No. of pumps                 | 3           | 2           | 2            | 2            |
| Model                        | Wilo        | Wilo        | Netzsch      | Netzsch      |
| Type                         | Submersible | Submersible | Surface pump | Surface pump |
| Flowrate (m <sup>3</sup> /h) | 1800.0      | 200.0       | 25.0         | 48.0         |
| Power ratings (KW)           | 90.0        | 15.0        | 5.5          | 7.5          |
